# Supplementary material for: Laparotomy versus Peritoneal Drainage as Primary Treatment for Surgical Necrotizing Enterocolitis or Spontaneous Intestinal Perforation in Preterm Neonates: A Systematic Review and Meta-Analysis
Source: MDPI journal article supplement (doi:10.3390/children10071170), 2023-07-06
Supplement: s1 [file s1]

# **Laparotomy versus Peritoneal Drainage as Primary Treatment for Necrotizing Enterocolitis or Spontaneous Intestinal Perforation in Neonates: A Systematic Review and Meta-analysis**

Online supplementary material

| Contents                                                                                       | Page |
|------------------------------------------------------------------------------------------------|------|
| Supplementary Table S1. Characteristics of included observational studies                      | 2-3  |
| Supplementary Table S2. Characteristics of included RCTs                                       | 4    |
| Supplementary Figure S1: Funnel plot evaluating publication bias.                              | 5    |
| Supplementary Figure S2. Forest plot for primary outcome, subgroup analysis of infants <1000g. | 6    |
| Supplementary Figure S3. Bubble plot for gestational age metaregression                        | 7    |
| Supplementary Table S3. Summary of findings, secondary outcomes.                               | 8    |

**Supplementary Table S1: Characteristics of included observational studies**

| Author, year          | N    | Design                       | Diagnosis | GA                  |
|-----------------------|------|------------------------------|-----------|---------------------|
| Ahle 2020 [63]        | 171  | Multicentre, retrospective   | SIP       | 25.7 (2.4)*         |
| Ahmed 1998 [26]       | 45   | Single center, retrospective | NEC       | 30.9 (3.3)*         |
| Alvarez 1999 [27]     | 18   | Single center, retrospective | NEC       | 31                  |
| Argumosa 2011 [41]    | 25   | Single center, retrospective | NEC, SIP  | 26.5 (23-33)**      |
| Ayed 2015 [52]        | 106  | Multicentre, retrospective   | NEC       | 25.8 (1.4)*         |
| Azarow 1997 [24]      | 86   | Single center, retrospective | NEC, SIP  | 29.5                |
| Badowicz 2000 [29]    | 83   | Multicentre, retrospective   | NEC       | 33.3 (4.1)*         |
| Blakely 2006 [37]     | 156  | Multicentre, retrospective   | NEC, SIP  | 25.2 (22-31)**      |
| Broekaert 2018 [58]   | 42   | Single center, retrospective | NEC, SIP  | 24.3 (23.2-25.6)*** |
| Canesin 2021 [66]     | 52   | Single center, retrospective | NEC       | 31.0 (2.9)*         |
| Chiu 2006 [38]        | 46   | Single center, retrospective | NEC, SIP  | 27.9                |
| Choo 2011 [42]        | 4657 | Multicentre, retrospective   | NEC       | NR                  |
| Dimmitt 2000 [30]     | 26   | Single center, retrospective | NEC       | 25.5 (1.7)*         |
| Duci 2018 [59]        | 48   | Single center, retrospective | NEC, SIP  | 26 (23–34.9)**      |
| Dzakovic 2001 [31]    | 143  | Single center, retrospective | NEC       | 27 (0.59)*          |
| Ehrlich 2001 [32]     | 70   | Single center, retrospective | NEC       | NR                  |
| Eicher 2012 [45]      | 28   | Single center, retrospective | NEC, SIP  | 24.3 (24-26)***     |
| Eid 2013 [49]         | 20   | Single center, prospective   | NEC       | NR                  |
| Fatemizadeh 2021 [67] | 36   | Single center, prospective   | SIP       | 25.3                |
| Federici 2017 [55]    | 184  | Multicentre, retrospective   | NEC       | NR                  |
| García 2012 [46]      | 32   | Single center, ambispective  | NEC       | 33.9 (27-41)**      |
| Geng 2018 [60]        | 294  | Multicentre, retrospective   | NEC       | 28.0 (2.0)*         |
| Horwitz 1995 [23]     | 252  | Single center, retrospective | NEC       | 31 (5.0)*           |
| Hull 2014 [50]        | 8935 | Multicentre, prospective     | NEC, SIP  | 25.9 (2.3)*         |
| Janik 1980 [20]       | 48   | Single center, retrospective | NEC       | 30 (25-39)**        |
| Kelleher 2012 [47]    | 240  | Single center, retrospective | NEC       | 26.5 (25-31)**      |

|                            |      |                              |          |                    |
|----------------------------|------|------------------------------|----------|--------------------|
| Khirallah 2017 [57]        | 56   | Single center, prospective   | NEC      | 31.9               |
| Lee 2020 [64]              | 36   | Single center, retrospective | NEC, SIP | 25.4 (23-39)**     |
| Mishra 2016 [54]           | 50   | Single center, retrospective | NEC, SIP | 36 (26-42)**       |
| Morgan 1994 [22]           | 49   | Single center, retrospective | NEC      | 29.0 (0.7)*        |
| Murcia-Pascual 2018 [61]   | 31   | Single center, retrospective | NEC      | 27.3 (1.3)*        |
| Noble 2001 [33]            | 40   | Single center, retrospective | NEC, SIP | 26.4               |
| Quiroz 2020 [65]           | 108  | Single center, ambispective  | NEC, SIP | 27.5 (3.6)*        |
| Rakshasbhuvankar 2012 [48] | 39   | Single center, retrospective | NEC, SIP | 25.0 (23.2-29.8)** |
| Robertson 1987 [21]        | 37   | Single center, retrospective | NEC      | NR                 |
| Romero 2005 [34]           | 14   | Single center, retrospective | NEC      | 29.1 (3.8)*        |
| Rovin 1999 [28]            | 28   | Single center, retrospective | NEC, SIP | 28.2 (3.1)*        |
| Roy 2005 [35]              | 32   | Single center, retrospective | NEC      | 32.5               |
| Sharma 2014 [51]           | 78   | Single center, prospective   | NEC, SIP | 26.5 (2.2)*        |
| Snyder 1997 [25]           | 103  | Single center, retrospective | NEC      | 31.1               |
| Stey 2015 [53]             | 1375 | Multicentre, retrospective   | NEC      | 27 (25-33)***      |
| Tashiro 2017 [56]          | 886  | Multicentre, retrospective   | NEC      | 23-34**            |
| Tepas 2006 [39]            | 65   | Single center, retrospective | NEC, SIP | 25.5 (1.7)*        |
| Tomislav 2021 [68]         | 23   | Single center, retrospective | NEC      | 27.7 (3.7)*        |
| Vasudevan 2010 [40]        | 35   | Single center, retrospective | NEC, SIP | 25.7 (1.9)*        |
| Wahid 2011 [43]            | 32   | Single center, retrospective | NEC      | 25.2               |
| Yanowitz 2019 [62]         | 528  | Multicentre, retrospective   | NEC      | 25 (23-26)***      |
| Zenciroğlu 2005 [36]       | 25   | Single center, retrospective | NEC      | 32.1 (3.8)*        |
| Zornoza 2011 [44]          | 30   | Single center, retrospective | NEC      | 26.1 (2.1)*        |

GA: gestational age. NEC: necrotizing enterocolitis. SIP: spontaneous intestinal perforation. \*Mean and SD  
\*\*Median and range. \*\*\*Median and interquartile range. NR: not reported. GA is reported as median in studies reporting range or IQR, and as mean otherwise.

**Supplementary Table S2: Characteristics of included RCTs**

| Study             | N   | Design          | Inclusion criteria | GA         |
|-------------------|-----|-----------------|--------------------|------------|
| Moss 2006 [11]    | 117 | Multicentre RCT | SIP/NEC <1500g     | 26 (2.1)   |
| Rees 2008 [12]    | 69  | Multicentre RCT | SIP/ NEC <1000g    | 26.3 (0.3) |
| Blakely 2021 [13] | 310 | Multicentre RCT | SIP/ NEC <1000g    | 25 (1.7)   |

RCT: randomized controlled trial. GA: gestational age. NEC: necrotizing enterocolitis. SIP: spontaneous intestinal perforation. GA values expressed as mean (SD)

Supplementary Figure S1: Funnel plot evaluating publication bias

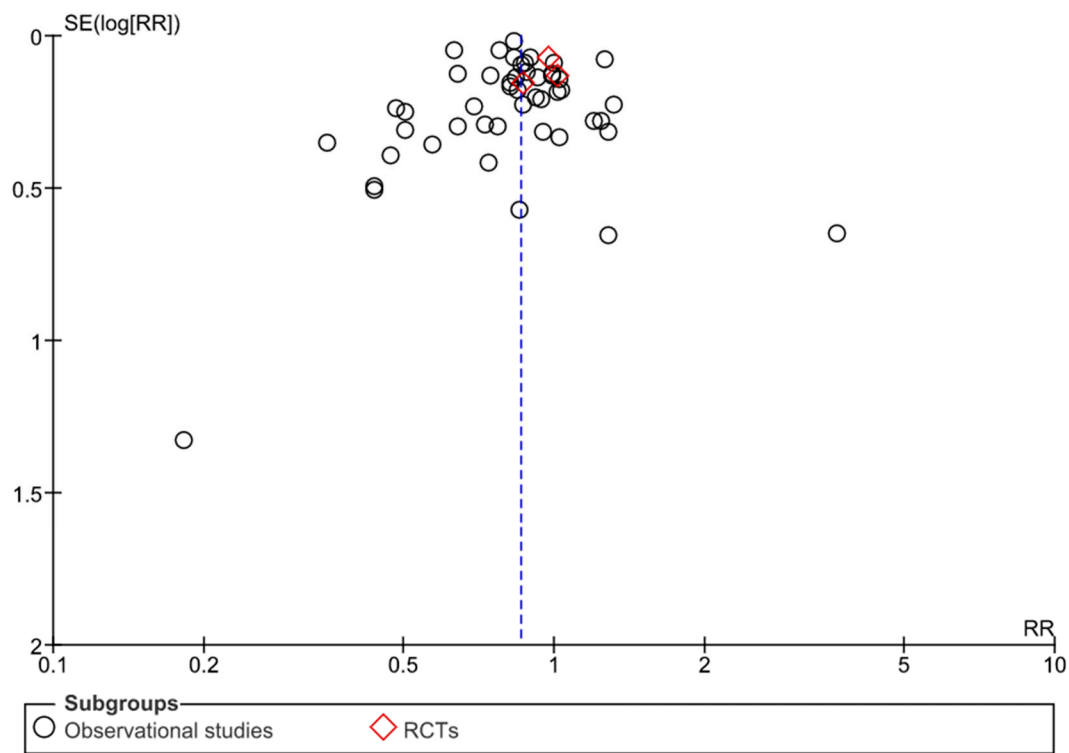

## Supplementary Figure S2: subgroup analysis of infants <1000g

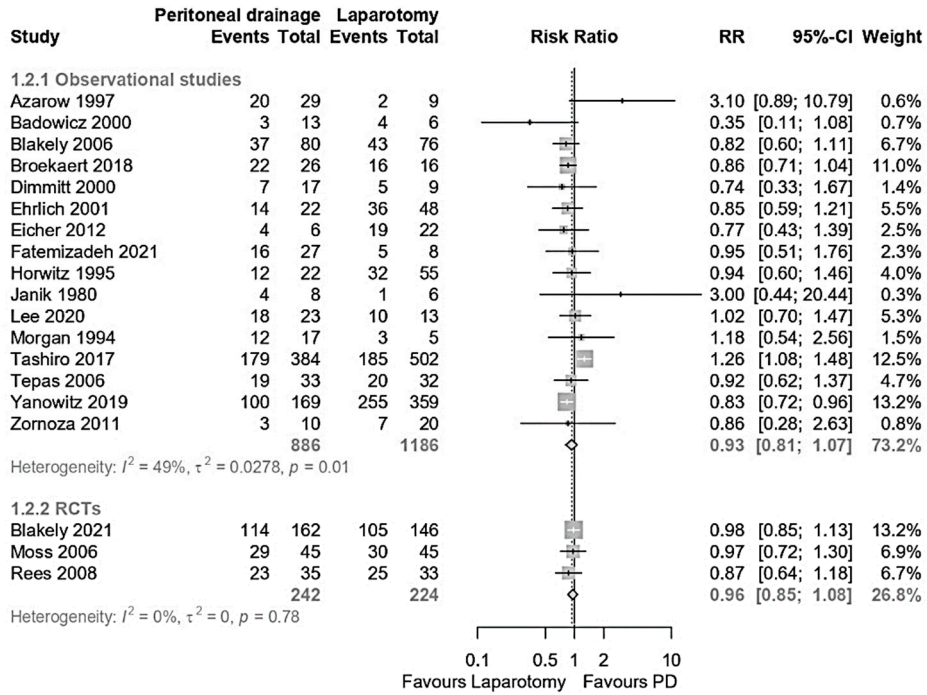

Supplementary Figure S3: Bubble plot for gestational age meta-regression

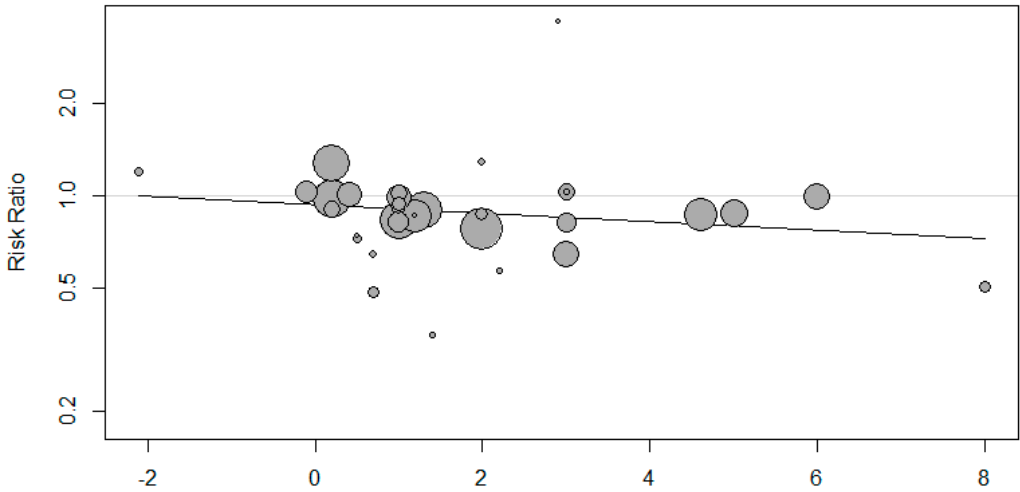

Linear regression of RR by differences in GA between study groups. Coefficient -0.03, p value 0.12.

**Supplementary Table S3: Summary of findings for pre-specified secondary outcomes**

| Outcome                                                | N    | RR or MD                               | Anticipated absolute effects      |                                               | Certainty of evidence |
|--------------------------------------------------------|------|----------------------------------------|-----------------------------------|-----------------------------------------------|-----------------------|
|                                                        |      |                                        | With Lap                          | With PD                                       |                       |
| TPN at 90 days, RCTs                                   | 116  | RR 1.18<br>95% CI 0.72 to 1.94         | 181 infants per 1000 <sup>1</sup> | 214 infants per 1000<br>(130 to 351 per 1000) | Moderate <sup>a</sup> |
| TPN at 90 days, observational studies                  | 438  | RR 1.44<br>95% CI 0.95 to 2.18         | 130 infants per 1000 <sup>1</sup> | 187 infants per 1000<br>(124 to 283 per 1000) | Low <sup>a</sup>      |
| Time to reach full enteral feeds, RCTs                 | 401  | MD 7.12 days<br>95% CI -6.91 to 21.15  | 49 days <sup>1</sup>              | 56 days<br>(42 days to 70 days)               | Moderate <sup>a</sup> |
| Tim to reach full enteral feeds, observational studies | 324  | MD 4.67 days<br>95% CI -5.46 to 14.80  | 30 days <sup>1</sup>              | 35 days<br>(25 days to 45 days)               | Very Low <sup>a</sup> |
| Duration of hospital stay, RCTs                        | 395  | MD 11.22 days<br>95% CI -1.56 to 24.00 | 112 days <sup>1</sup>             | 123 days<br>(110 days to 136 days)            | Moderate <sup>a</sup> |
| Duration of hospital stay, observational studies       | 1961 | MD 6.90<br>95% CI -0.13 to 13.94       | 93 days <sup>1</sup>              | 100 days<br>(93 days to 107 days)             | Low <sup>a</sup>      |
| Intestinal stricture, RCTs                             | 492  | RR 1.42<br>95% CI 0.62 to 3.24         | 38 infants per 1000 <sup>1</sup>  | 54 infants per 1000<br>(24 to 123 per 1000)   | Moderate <sup>a</sup> |
| Intestinal stricture, observational studies            | 639  | RR 0.59<br>95% CI 0.27 to 1.31         | 140 infants per 1000 <sup>1</sup> | 83 infants per 1000<br>(38 to 183 per 1000)   | Low <sup>a</sup>      |
| Abdominal abscess, RCTs                                | 493  | RR 0.80<br>95% CI 0.30 to 2.14         | 33 infants per 1000 <sup>1</sup>  | 26 infants per 1000<br>(10 to 71 per 1000)    | Moderate <sup>a</sup> |
| Abdominal abscess, observational studies               | 210  | RR 1.58<br>95% CI 0.51 to 4.90         | 50 infants per 1000 <sup>1</sup>  | 79 infants per 1000<br>(26 to 245 per 1000)   | Very Low <sup>a</sup> |
| Intestinal fistula, RCTs                               | 185  | RR 2.99<br>95% CI 0.61 to 14.67        | 21 infants per 1000 <sup>1</sup>  | 63 infants per 1000<br>(13 to 308 per 1000)   | Moderate <sup>a</sup> |
| Intestinal fistula, observational studies              | 163  | RR 1.23<br>95% CI 0.59 to 2.57         | 130 infants per 1000 <sup>1</sup> | 160 infants per 1000<br>(77 to 334 per 1000)  | Low <sup>a</sup>      |

<sup>1</sup>Estimate from pooled analysis of control groups. <sup>a</sup>Certainty was deemed Moderate in view of study design, risk of bias, downgraded from High given imprecision of results due to limited study sample. <sup>b</sup>Certainty was deemed low in view of the study design and risk of bias
